# Supplementary material for: Bioelectrical‐Impedance‐Analysis in the Perioperative Nutritional Assessment and Prediction of Complications in Head‐and‐Neck Malignancies
Source: PubMed Central journal article supplement (PMC11696890; doi:10.1002/oto2.70046), 2025-01-03
Supplement: OTO2-9-e70046-s001.pdf [file OTO2-9-e70046-s001.pdf]

**Subjective Global Assessment Form**

Patient's sticker

**Part 1: History**

|                                                                                                                                      | <b>A</b>                          | <b>B</b>                              | <b>C</b>                            |
|--------------------------------------------------------------------------------------------------------------------------------------|-----------------------------------|---------------------------------------|-------------------------------------|
| <b>Weight Change</b><br>Weight change in past 6 months: _____ kg                                                                     | <input type="checkbox"/> <5% loss | <input type="checkbox"/> 5 – 10% loss | <input type="checkbox"/> > 10% loss |
| Change in past 2 weeks                                                                                                               | <input type="checkbox"/> increase | <input type="checkbox"/> no change    | <input type="checkbox"/> decrease   |
| <b>Dietary Intake Change</b><br>Overall change: ___ no change ___ change Duration: ___ weeks                                         | <input type="checkbox"/>          | <input type="checkbox"/>              | <input type="checkbox"/>            |
| Type of change: ___ suboptimal solid diet ___ full liquid diet<br>___ hypocaloric liquid ___ starvation                              | <input type="checkbox"/>          | <input type="checkbox"/>              | <input type="checkbox"/>            |
| <b>GI symptoms change</b> (persisted >2 weeks)<br>___ none ___ nausea ___ vomiting ___ diarrhoea ___ anorexia                        | <input type="checkbox"/>          | <input type="checkbox"/>              | <input type="checkbox"/>            |
| <b>Functional capacity</b><br>Overall improvement:                                                                                   | <input type="checkbox"/> none     | <input type="checkbox"/> moderate     | <input type="checkbox"/> severe     |
| Change in past 2 weeks:                                                                                                              | <input type="checkbox"/> improved | <input type="checkbox"/> no change    | <input type="checkbox"/> regressed  |
| <b>Disease and its relation to nutritional requirements</b><br>Metabolic demands, stress level: ___ no ___ low ___ moderate ___ high | <input type="checkbox"/>          | <input type="checkbox"/>              | <input type="checkbox"/>            |

**Part 2: Physical Examination**

|                                           | <b>A</b>                 | <b>B</b>                 | <b>C</b>                 |
|-------------------------------------------|--------------------------|--------------------------|--------------------------|
| Loss of subcutaneous fat (triceps, chest) | <input type="checkbox"/> | <input type="checkbox"/> | <input type="checkbox"/> |
| Muscle wasting (quadriceps, deltoids)     | <input type="checkbox"/> | <input type="checkbox"/> | <input type="checkbox"/> |
| Edema (ankle, sacral)                     | <input type="checkbox"/> | <input type="checkbox"/> | <input type="checkbox"/> |
| Ascites                                   | <input type="checkbox"/> | <input type="checkbox"/> | <input type="checkbox"/> |

**Part 3: Overall SGA rating (select one)**

|                                   |                                                 |
|-----------------------------------|-------------------------------------------------|
| <input type="checkbox"/> <b>A</b> | Well nourished                                  |
| <input type="checkbox"/> <b>B</b> | Moderately (or suspected of being) malnourished |
| <input type="checkbox"/> <b>C</b> | Severely malnourished                           |
